# Supplementary material for: A hierarchically multifunctional integrated catalyst with intimate and synergistic active sites for one-pot tandem catalysis
Source: Royal Society of Chemistry journal article supplement (doi:10.1039/d1qi00170a), 2021-01-01
Supplement: d1qi00170a6.pdf [file d1qi00170a6.pdf]

## **Hierarchically multifunctional integrated catalyst with intimate and synergistic active sites for one-pot tandem catalysis**

Yao Yao,<sup>a,b</sup> Kexin Huang,<sup>a</sup> Yi Liu,<sup>\*c</sup> Tingting Luo,<sup>b</sup> Ge Tian,<sup>b</sup> Jiaxin Li,<sup>a,b</sup> Song Zhang,<sup>b</sup> Ganggang Chang<sup>\*a</sup> and Xiaoyu Yang<sup>b</sup>

<sup>a</sup> School of Chemistry, Chemical Engineering and Life Science, Wuhan University of Technology, Wuhan 430070, Hubei, China

<sup>b</sup> State Key Laboratory of Advanced Technology for Materials Synthesis and Processing, Wuhan University of Technology, 122, Luoshi Road, Wuhan 430070, Hubei, China

<sup>c</sup> School of Mechanical and Electronic, Engineering Wuhan Donghu University, Wuhan 430212, Hubei, China

E-mail: changgang2016@whut.edu.cn (Ganggang Chang);  
liuyiwoei@163.com (Yi Liu)

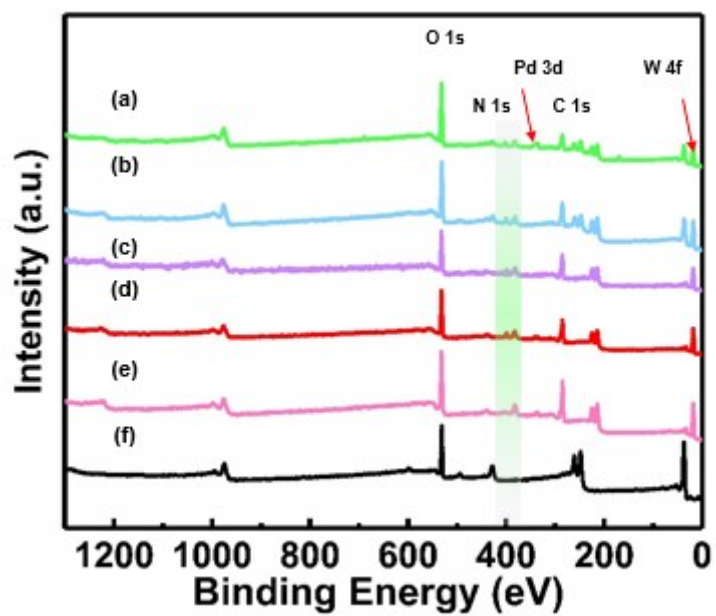

**Fig. S1** Survey spectra of (a) 0.86 wt% Pd@HPW@HP-UiO-66-NH<sub>2</sub>, (b) HPW@HP-UiO-66-NH<sub>2</sub>, (c) HP-UiO-66-NH<sub>2</sub>, (d) Pd@HP-UiO-66-NH<sub>2</sub>, (e) Pd@UiO-66, (f) HPW.

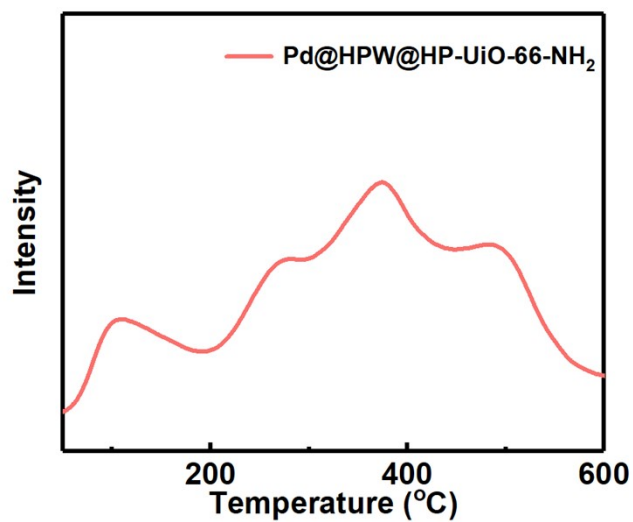

**Fig. S2**  $\text{NH}_3$ -TPD of 0.86 wt%  $\text{Pd@HPW@HP-UiO-66-NH}_2$ .  $\text{NH}_3$ -TPD experiment was performed on a home-made TPD apparatus. The sample was pretreated at 573 K for 1 h, adsorbed at 300 K for 0.5 h, and then purged with argon gas to remove the  $\text{NH}_3$ . The desorption process started from 200 K to 600 K at a heating rate of 10 K/min.

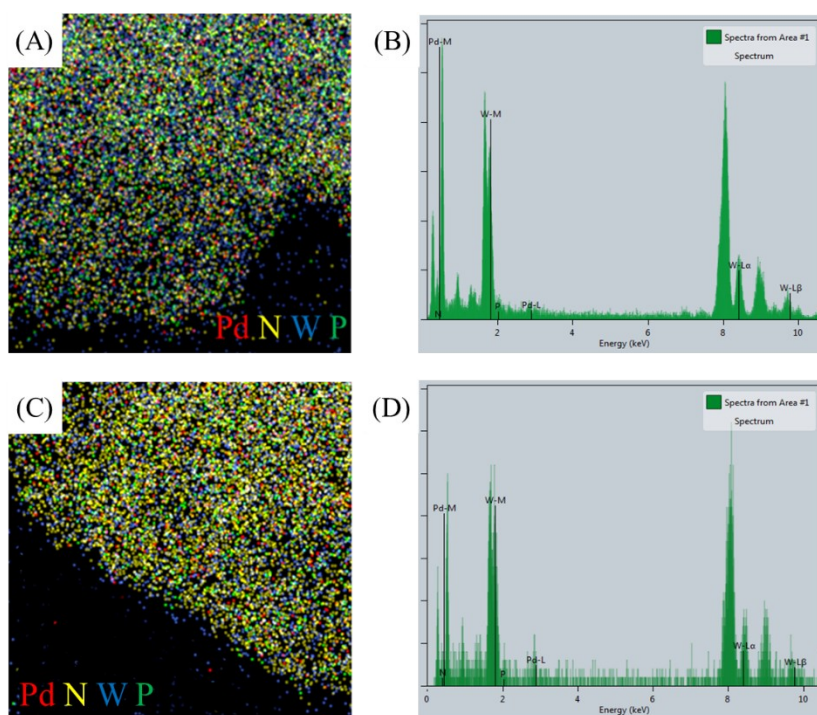

**Fig.S3** (A-B) EDX elemental mapping of 0.86 wt% Pd@HPW@HP-UiO-66-NH<sub>2</sub>; (C-D) EDX elemental mapping of 0.86 wt% Pd@HPW@HP-UiO-66-NH<sub>2</sub> after 5 runs.

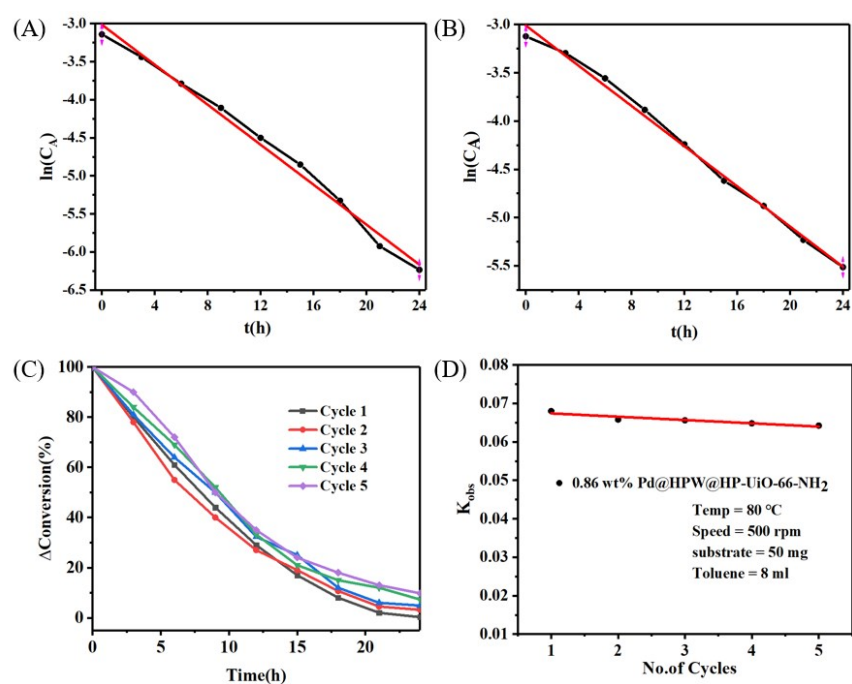

**Fig.S4** First-order reversible reaction kinetics plot for (A) the first catalytic cycle, (B) the fifth catalytic cycle and (C-D) kinetic study of catalyst deactivation.
