# Supplementary figures and images for: A hierarchically multifunctional integrated catalyst with intimate and synergistic active sites for one-pot tandem catalysis
Source: Royal Society of Chemistry journal article supplement (doi:10.1039/d1qi00170a), 2021-01-01

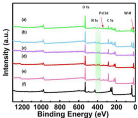

Supplement: d1qi00170a2.pdf [file d1qi00170a2.pdf]

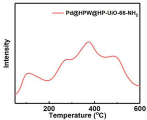

Supplement: d1qi00170a3.pdf [file d1qi00170a3.pdf]

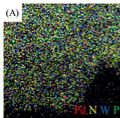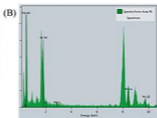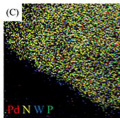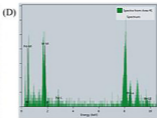

Supplement: d1qi00170a4.pdf [file d1qi00170a4.pdf]

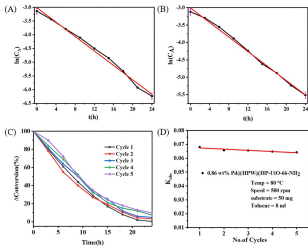

Supplement: d1qi00170a5.pdf [file d1qi00170a5.pdf]
